# Supplementary material for: Eyelid Skin Grafting in Young Patients with Facial Nerve Palsy
Source: MDPI journal article supplement (doi:10.3390/jcm13072142), 2024-04-08
Supplement: s1 [file s1]

| Case | Preoperative                                                                        | Late Postoperative                                                                   |
|------|-------------------------------------------------------------------------------------|--------------------------------------------------------------------------------------|
| 1    |    |    |
| 2    |    |    |
| 3    |   |   |
| 4    |  |  |
| 5    |  |  |

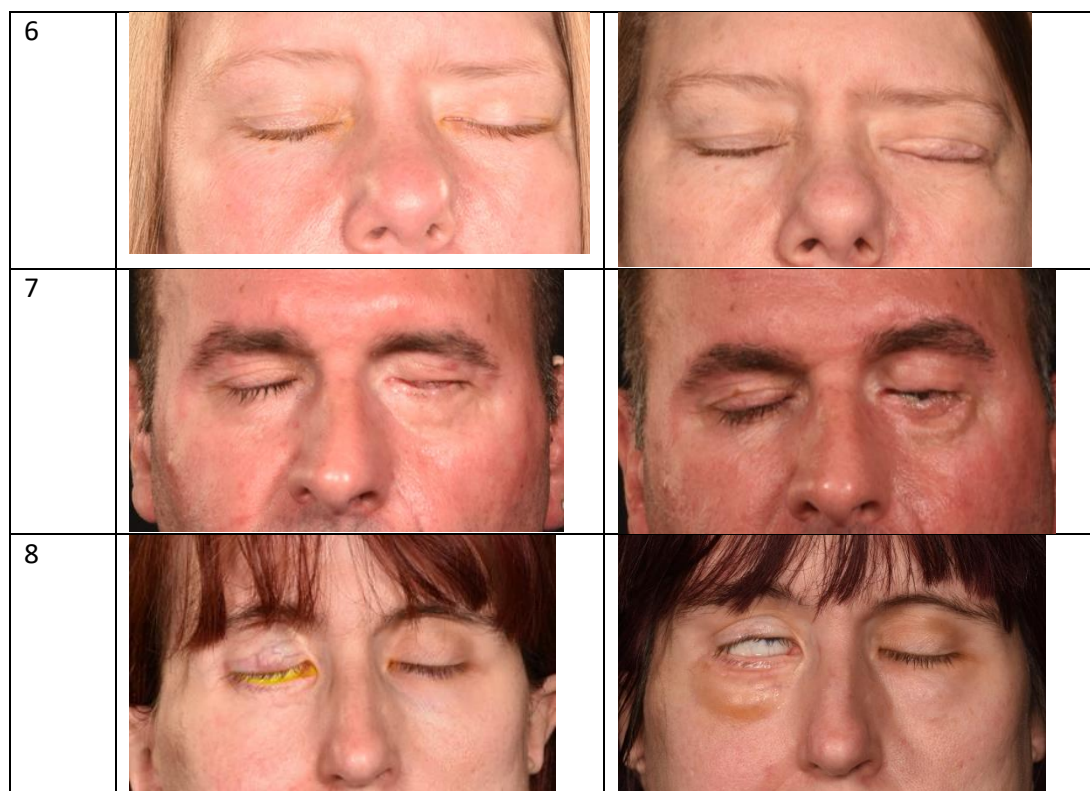

Supplement Figure S1:

Standardized photographs with gentle eye closure in eight consecutive young adults with facial nerve palsy (P1–P8) at pre-skin grafting and late postoperative follow-up.
